# Supplementary material for: Clinical Outcomes and Oral Health-Related Quality of Life after Periodontal Treatment with Community Health Worker Strategy in Patients with Type 2 Diabetes: A Randomized Controlled Study
Source: Int J Environ Res Public Health. 2021 Aug 7;18(16):8371. doi: 10.3390/ijerph18168371 (PMC8394731; doi:10.3390/ijerph18168371)
Supplement: Supplementary file 1 [file ijerph-18-08371-s001.zip › ijerph-1269574-SI.pdf]

**Table S1.** Contents of periodontal care curriculum.

---

|                                                       |                                                                            |
|-------------------------------------------------------|----------------------------------------------------------------------------|
| 1. Toothbrushing tools and methods                    |                                                                            |
| 1.1                                                   | Choice of toothbrush                                                       |
| 1.2                                                   | Appropriate toothbrushing methods (Bass / Modified Bass technique)         |
| 1.3                                                   | Other commonly used toothbrushing tools                                    |
| 2. Treatment and care of periodontal disease          |                                                                            |
| 2.1                                                   | Process of periodontal treatment                                           |
| 2.2                                                   | Oral health self-care methods                                              |
| 2.3                                                   | Feedback of toothbrushing skill (with plaque disclosing agents)            |
| 3. Oral health knowledge related to diabetes mellitus |                                                                            |
| 3.1                                                   | The correlation between diabetes and periodontal disease                   |
| 3.2                                                   | Common oral health problems in diabetes                                    |
| 3.3                                                   | Feedback of toothbrushing skill (with plaque disclosing agents)            |
| 3.4                                                   | Provide self-check method of teeth cleanliness by plaque disclosing agent  |
| 4. Overall review                                     |                                                                            |
| 4.1                                                   | Review the content of the previous curriculum and emphasize the key points |
| 4.2                                                   | Feedback of toothbrushing skill (with plaque disclosing agents)            |

---
